# Supplementary material for: Graphene Oxide-Based Membranes Intercalated with an Aromatic Crosslinker for Low-Pressure Nanofiltration
Source: MDPI journal article supplement (doi:10.3390/membranes12100966), 2022-10-02
Supplement: s1 [file s1]

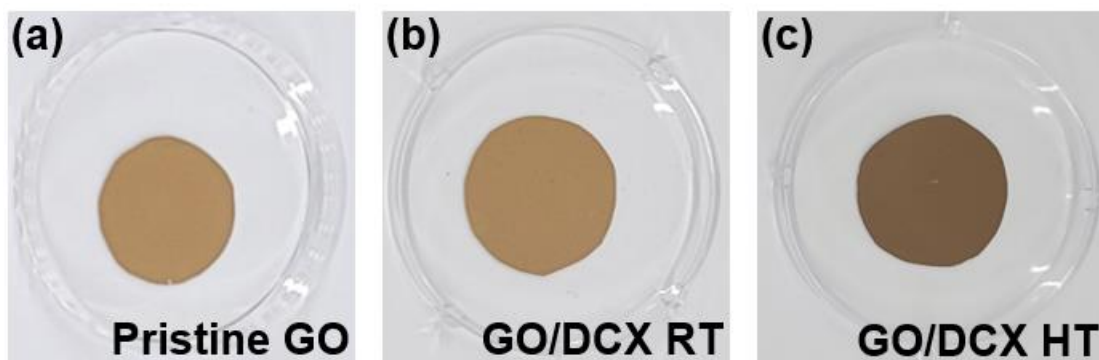

**Figure S1.** Color change of the prepared membranes from dark blonde ((a) Pristine GO and (b) GO/DCX RT) to dark brown ((c) GO/DCX HT).

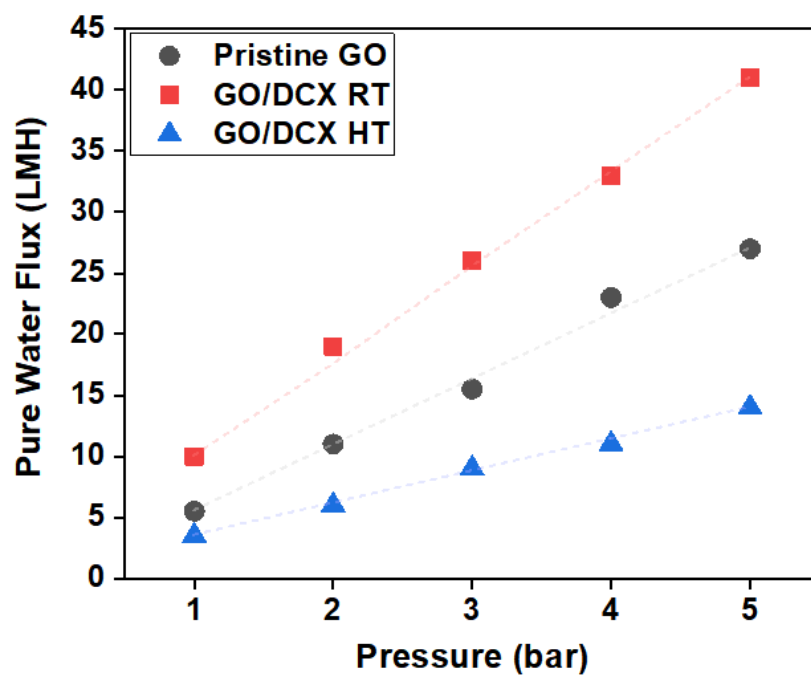

**Figure S2.** The pure water flux versus pressure (1–5 bar) of the prepared membranes.

**Table S1** Dye rejection efficiencies and PWP of the GO membranes at 1 bar (feed solution concentration: 10 mg L<sup>-1</sup>).

| Membrane    | Pure Water Permeance<br>(LMH bar <sup>-1</sup> ) | Dye rejection rate (%) |      |      |      |      |
|-------------|--------------------------------------------------|------------------------|------|------|------|------|
|             |                                                  | RB                     | MB   | AF   | RhB  | MO   |
| Pristine GO | 4.5 ± 1                                          | 100                    | 99.8 | 100  | 86.4 | 92.5 |
| GO/DCX RT   | 11 ± 2                                           | 100                    | 100  | 99.5 | 85.1 | 86.1 |
| GO/DCX HT   | 3.5 ± 1.5                                        | 100                    | 99.5 | 99.6 | 93.6 | 99.7 |

**Table S2** Salt rejection efficiencies of the GO membranes under two different applied pressures (feed solution concentration: 500 mg L<sup>-1</sup>).

| Membrane    | Applied Pressure $\Delta p$<br>(bar) | Salt rejection rate (%)         |      |                   |                   |
|-------------|--------------------------------------|---------------------------------|------|-------------------|-------------------|
|             |                                      | Na <sub>2</sub> SO <sub>4</sub> | NaCl | MgSO <sub>4</sub> | MgCl <sub>2</sub> |
| Pristine GO | 3                                    | 82.5                            | 45.2 | 26.9              | 16.8              |
|             | 5                                    | 81.5                            | 48.0 | 33.7              | 19.4              |
| GO/DCX RT   | 3                                    | 89.1                            | 51.6 | 29.9              | 18.6              |
|             | 5                                    | 83.9                            | 50.4 | 35.0              | 28.0              |
| GO/DCX HT   | 3                                    | 92.0                            | 54.4 | 28.3              | 15.6              |
|             | 5                                    | 89.4                            | 56.4 | 33.9              | 20.5              |

**Table S3** Performance comparison of crosslinked GO-based NF membranes for water purification.

| Membrane         | Applied     | Pure Water               | Na <sub>2</sub> SO <sub>4</sub> |           | Ref.      |
|------------------|-------------|--------------------------|---------------------------------|-----------|-----------|
|                  | Pressure Δp | Permeance                | Concentration                   | Rejection |           |
|                  | (bar)       | (LMH bar <sup>-1</sup> ) |                                 | (%)       |           |
| GO/DCX RT        | 3           | 8.7                      | 500 ppm                         | 89.1      | This work |
| GO/DCX HT        | 3           | 3.0                      | 500 ppm                         | 92.0      | This work |
| BPPO/EDA/GO      | 1           | 4.1                      | 1000 ppm                        | 56.2      | [1]       |
| CGOPVA-50        | 5           | 2.6 ± 1.1                | 20 mM                           | 91.0      | [2]       |
| TEOA/GO          | 9           | 4                        | 500 ppm                         | 85.0      | [3]       |
| PDA-GO/β-CD-EDA  | 5           | 6.8                      | 1000 ppm                        | 71.9      | [4]       |
| Activated GO-PEI | 1           | 7.0                      | 2000 ppm                        | 50.0      | [5]       |
| PEI/POSS-GO      | 4.5         | 7.2                      | 1100 ppm                        | 76.0      | [6]       |
| GO-PA/APVC       | 4           | 2.5                      | 2000ppm                         | 82.6      | [7]       |
| TA/GOQDs-0.5     | 2           | 9.1                      | 1000 ppm                        | 65.7      | [8]       |
| TMPyP/GO         | 8           | 1.2                      | 2000 ppm                        | 87.7      | [9]       |
| GO-EDA           | 2           | 2.3                      | 500 ppm                         | 82.4      | [10]      |
| GO/EDA_HPEI 60K  | 1           | 5                        | 1000 ppm                        | 40.0      | [11]      |
| PrGO6-50         | 8           | 4.2                      | 500 ppm                         | 81.5      | [12]      |

**Supplementary References**

1. Meng, N.; Zhao, W.; Shamsaei, E.; Wang, G.; Zeng, X.; Lin, X.; Xu, T.; Wang, H.; Zhang, X. A Low-Pressure GO Nanofiltration Membrane Crosslinked via Ethylenediamine. *J. Membr. Sci.* **2018**, *548*, 363–371.
2. Park, M.J.; Nisola, G.M.; Seo, D.H.; Wang, C.; Phuntsho, S.; Choo, Y.; Chung, W.J.; Shon, H.K. Chemically Cross-Linked Graphene Oxide as a Selective Layer on Electrospun Polyvinyl Alcohol Nanofiber Membrane for Nanofiltration Application. *Nanomaterials* **2021**, *11*, 2867.
3. Nakagawa, K.; Araya, S.; Kunimatsu, M.; Yoshioka, T.; Shintani, T.; Kamio, E.; Matsuyama, H. Fabrication of Stacked Graphene Oxide Nanosheet Membranes Using Triethanolamine as a Crosslinker and Mild Reducing Agent for Water Treatment. *Membranes (Basel)*. **2018**, *8*, 130.
4. Kong, F. xin; Liu, Q.; Dong, L. qian; Zhang, T.; Wei, Y. bin; Chen, J. fu; Wang, Y.; Guo, C. mei Rejection of Pharmaceuticals by Graphene Oxide Membranes: Role of Crosslinker and Rejection Mechanism. *J. Membr. Sci.* **2020**, *612*, 118338.
5. Parsamehr, P.S.; Zahed, M.; Tofighy, M.A.; Mohammadi, T.; Rezakazemi, M. Preparation of Novel Cross-Linked Graphene Oxide Membrane for Desalination Applications Using (EDC and NHS)-Activated Graphene Oxide and PEI. *Desalination* **2019**, *468*, 114079.
6. Bandehali, S.; Moghadassi, A.; Parvizian, F.; Zhang, Y.; Hosseini, S.M.; Shen, J. New Mixed Matrix PEI Nanofiltration Membrane Decorated by Glycidyl-POSS Functionalized Graphene Oxide Nanoplates with Enhanced Separation and Antifouling Behaviour: Heavy Metal Ions Removal. *Sep. Purif. Technol.* **2020**, *242*, 116745.

7. Qin, Y.; Liu, H.; Liu, Y.; Chen, M.; Chen, K.; Huang, Y.; Xiao, C. Design of a Novel Interfacial Enhanced GO-PA/APVC Nanofiltration Membrane with Stripe-like Structure. *J. Membr. Sci.* **2020**, *604*, 118064.
8. Zhang, C.; Wei, K.; Zhang, W.; Bai, Y.; Sun, Y.; Gu, J. Graphene Oxide Quantum Dots Incorporated into a Thin Film Nanocomposite Membrane with High Flux and Antifouling Properties for Low-Pressure Nanofiltration. *ACS Appl. Mater. Interfaces* **2017**, *9*, 11082–11094.
9. Xu, X.L.; Lin, F.W.; Du, Y.; Zhang, X.; Wu, J.; Xu, Z.K. Graphene Oxide Nanofiltration Membranes Stabilized by Cationic Porphyrin for High Salt Rejection. *ACS Appl. Mater. Interfaces* **2016**, *8*, 12588–12593.
10. Su, J.; Jia, M.; Wu, W.; Li, Z.; Li, W. Chemical Vapor Crosslinking of Graphene Oxide Membranes for Controlling Nanochannels. *Environ. Sci. Nano* **2020**, *7*, 2924–2929.
11. Zhang, Y.; Zhang, S.; Chung, T.S. Nanometric Graphene Oxide Framework Membranes with Enhanced Heavy Metal Removal via Nanofiltration. *Environ. Sci. Technol.* **2015**, *49*, 10235–10242.
12. Zhang, Z.; Li, N.; Sun, Y.; Yang, H.; Zhang, X.; Li, Y.; Wang, G.; Zhou, J.; Zou, L.; Hao, Z. Interfacial Force-Assisted In-Situ Fabrication of Graphene Oxide Membrane for Desalination. *ACS Appl. Mater. Interfaces* **2018**, *10*, 27205–27214.
